# Supplementary material for: Memory characteristics of anthracene-based polyimides in non-volatile resistive memory devices
Source: Royal Society of Chemistry journal article supplement (doi:10.1039/d3ma00453h), 2023-01-01
Supplement: d3ma00453h1.pdf [file d3ma00453h1.pdf]

## Memory Characteristics of Anthracene-based Polyimides in Non-volatile Resistive Memory Devices

Seung-Hyun Lee<sup>a</sup>, Sechang Park<sup>b</sup>, Ju-Young Choi<sup>a</sup>, Yun-Je Choi<sup>a</sup>, Hyung Woo Ji<sup>a</sup>, Hyeyoung Joung<sup>a</sup>, Dam-Bi Kim<sup>a</sup>, Kang -Hoon Yoon<sup>a</sup>, Gyumin Ji<sup>b</sup>, Daeho Choi<sup>b</sup>, Jaekang Lee<sup>b</sup>, Ki-Jung Paeng<sup>a</sup>, Jaesung Yang<sup>a</sup>, Soohaeng Cho<sup>\*b</sup>, and Chan-Moon Chung<sup>\*a</sup>

<sup>a</sup> Department of Chemistry, Yonsei University, Wonju, Gangwon-do, 26493, Republic of Korea

<sup>b</sup> Department of Physics, Yonsei University, Wonju, Gangwon-do, 26493, Republic of Korea

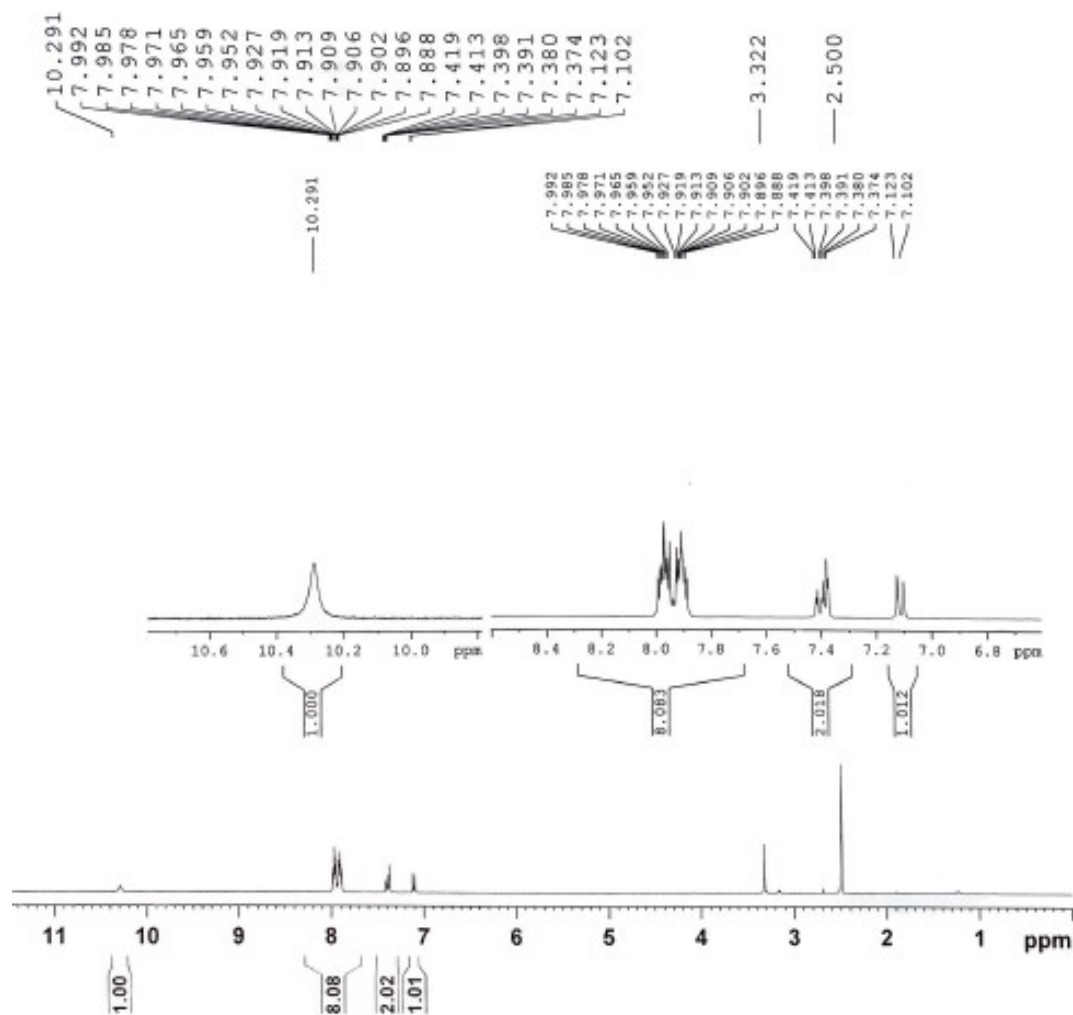

Figure S1. <sup>1</sup>H NMR spectrum of Amidol-DP in DMSO-*d*<sub>6</sub>.

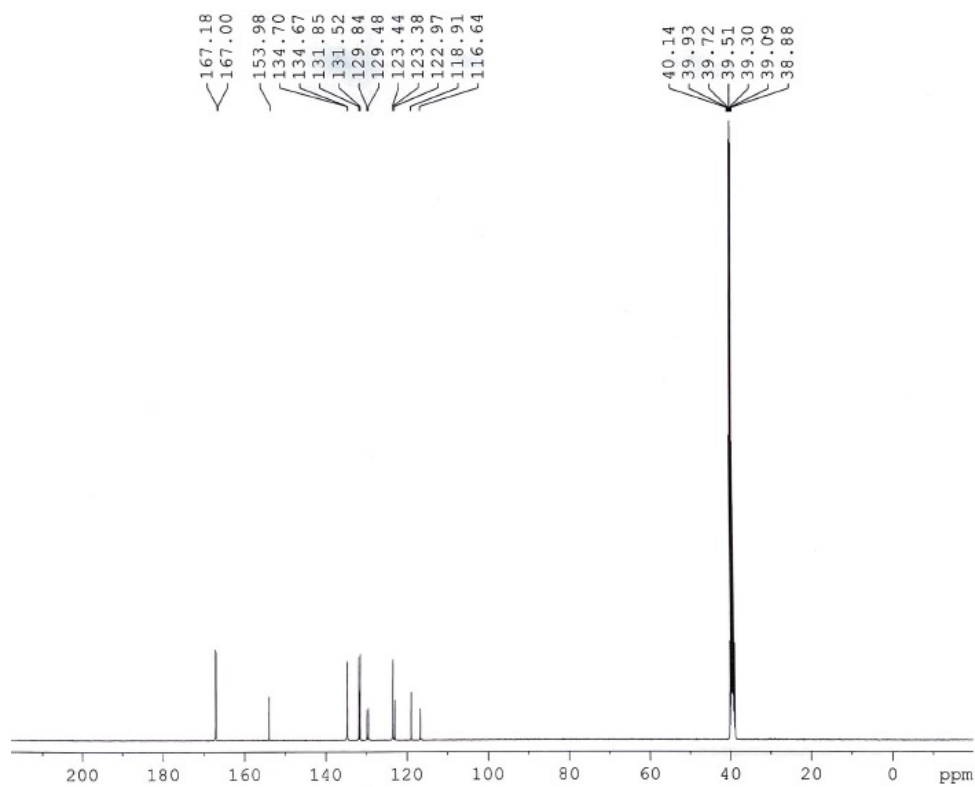

**Figure S2.**  $^{13}\text{C}$  NMR spectrum of Amidol-DP in DMSO- $d_6$ .

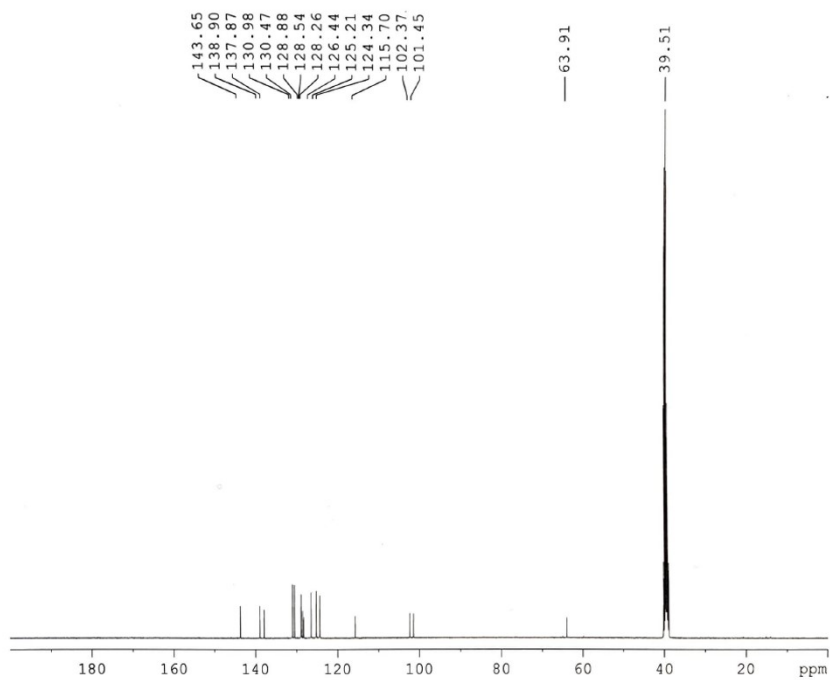

**Figure S3.**  $^{13}\text{C}$  NMR spectrum of AMDA in DMSO- $d_6$ .

**Table S1.** Solubility of PIs

| Polymer      | NMP        | DMF     | DMAc    | DMSO     | THF |
|--------------|------------|---------|---------|----------|-----|
|              | Chloroform | Acetone | Ethanol | Methanol | MC  |
| 6FDA-AMDA PI | ++         | ++      | ++      | ++       | ++  |
|              | --         | ++      | +-      | +-       | +-  |
| 6FDA-AnDA PI | ++         | ++      | ++      | ++       | ++  |
|              | --         | --      | --      | --       | --  |

<sup>a</sup> Solubility was tested with a 10 mg sample in a 1 mL solvent at 25 °C.

<sup>b</sup> Solubility: ++, soluble at 25 °C; +-, partial soluble at 25 °C, but soluble after heating at 50 °C;

--, insoluble even in heating at 50 °C.

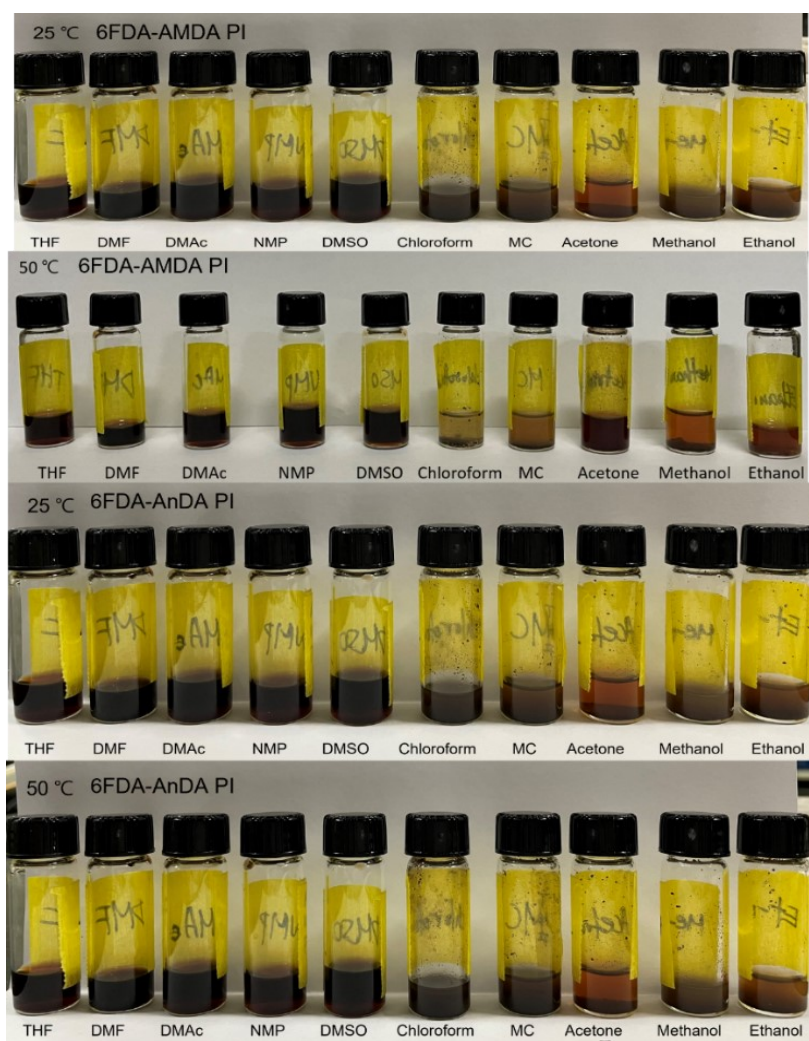

**Figure S4.** Solutions of 6FDA-AMDA PI and 6FDA-AnDA PI in various solvents.

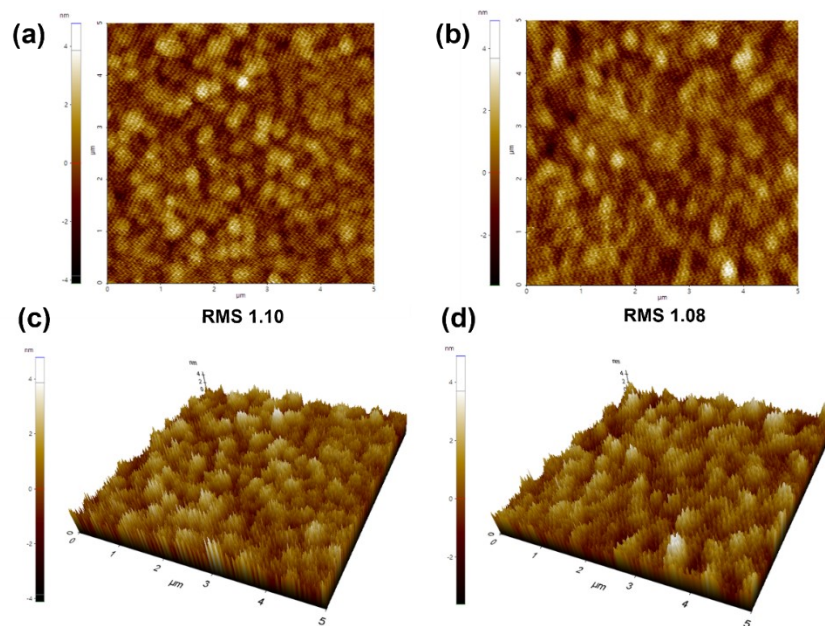

**Figure S5.** AFM images of (a) a 6FDA-AMDA PI film and (b) a 6FDA-AnDA PI film. 3D-AFM images of (a) a 6FDA-AMDA PI film and (d) a 6FDA-AnDA PI film.

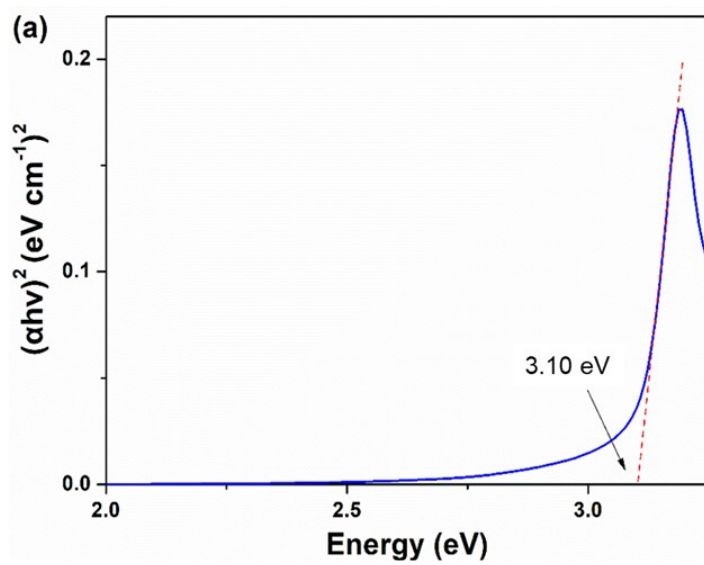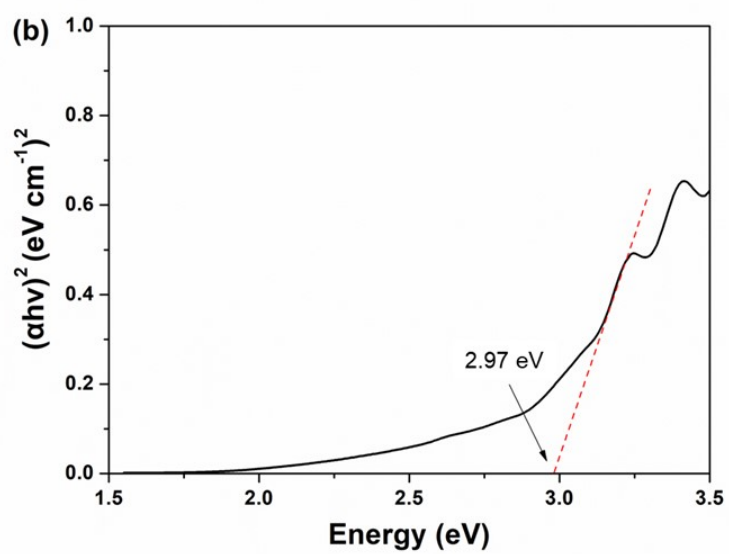

Figure S6. Tauc plot of (a) 6FDA-AMDA PI and (b) 6FDA-AnDA PI.
